# Supplementary material for: Soil microbial community structure and diversity are largely influenced by soil pH and nutrient quality in 78-year-old tree plantations
Source: Copernicus journal article supplement (doi:10.5194/bg-2016-552), 2017-01-26
Supplement: Supplementary file 1 [file bg-2016-552-supplement.pdf]

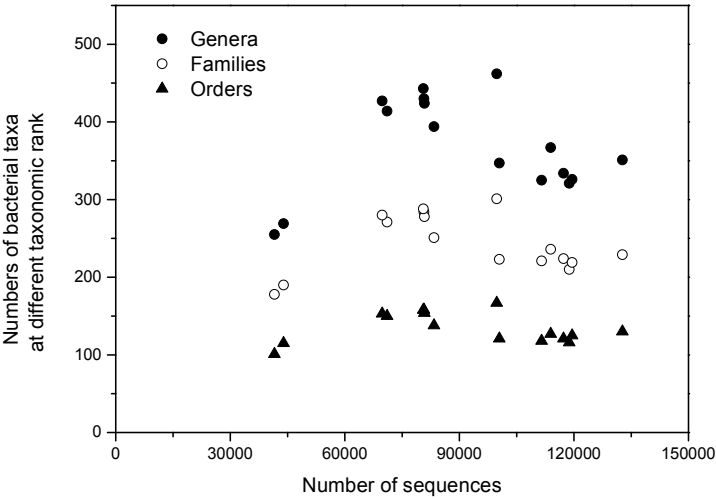

**Figure S1.** Number of bacterial genera, families and orders for each of the soil samples related to the total number of bacterial sequences in 78-year-old forest plantations with different tree species.

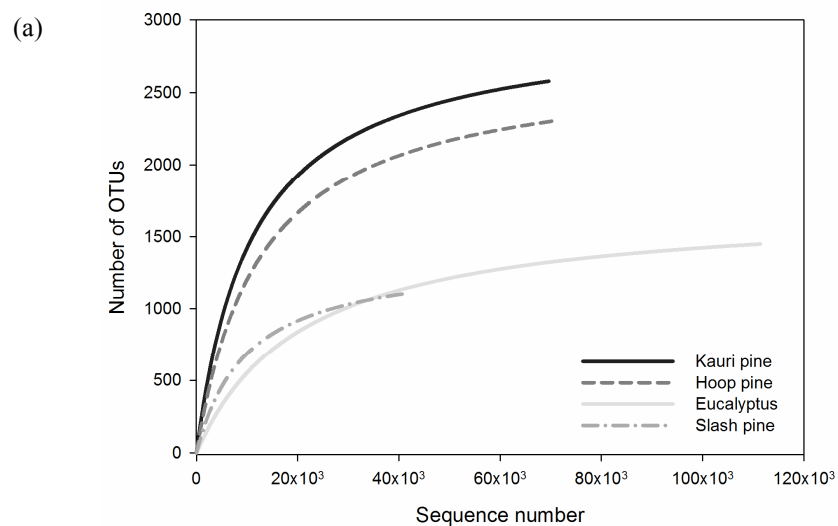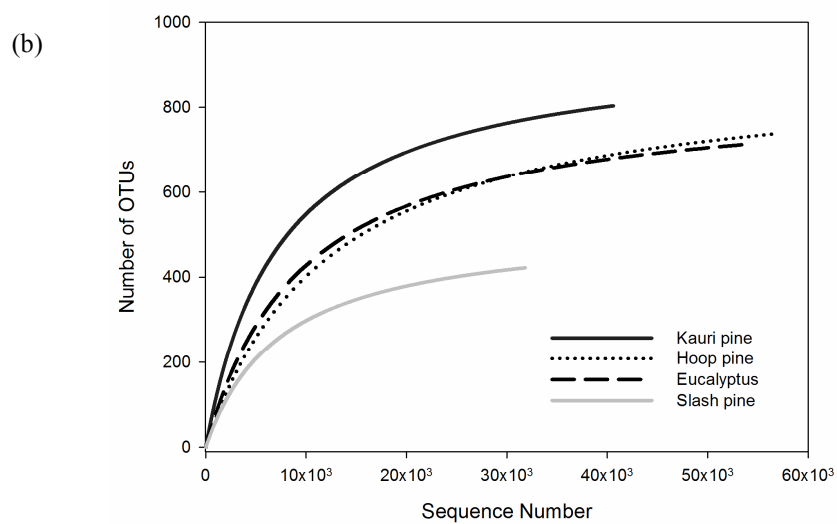

**Figure S2.** Rarefaction curves of soil bacteria (a) and eukaryotes (b) in 78-year-old forest plantations with different tree species. OTU, operational taxonomical unit.

5

10

15

20

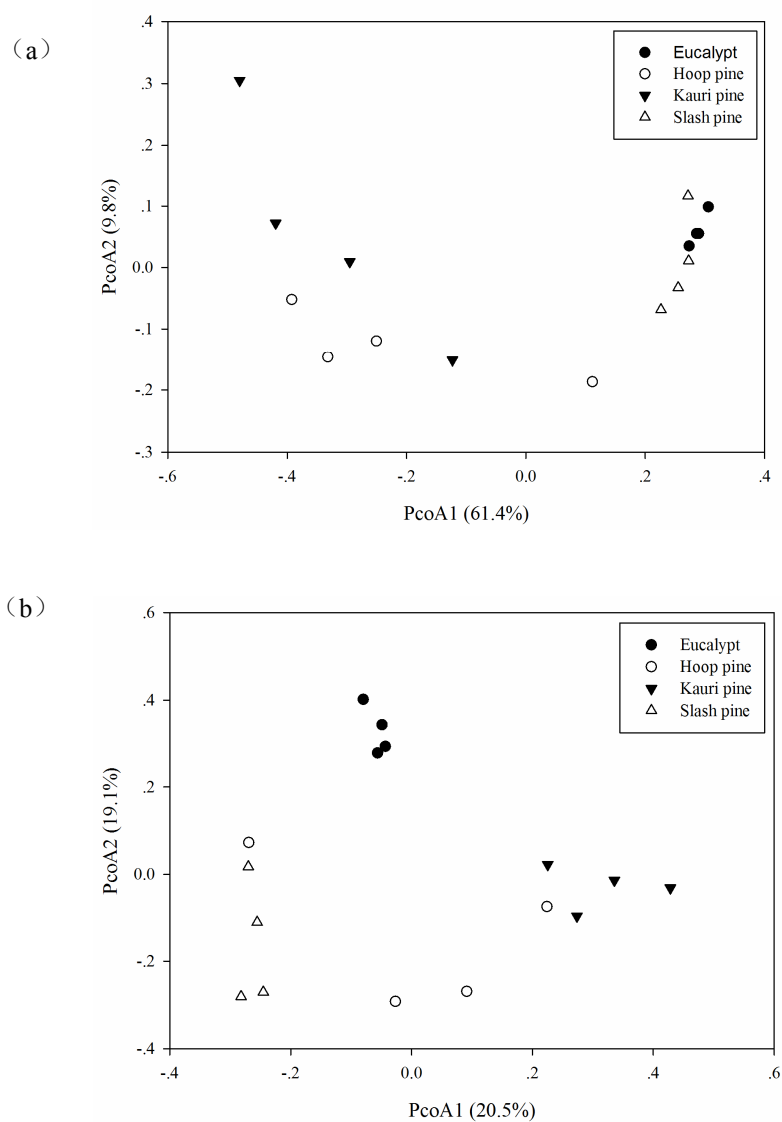

**Figure S3.** Principal component analysis (PcoA) of community structure of bacterial (a) and eukaryotic (b) phyla in soils under different tree species.
